# Supplementary material for: Early stages in the degradation of metal–organic frameworks in liquid water from first-principles molecular dynamics
Source: Royal Society of Chemistry journal article supplement (doi:10.1039/c2cp40339k), 2012-01-01
Supplement: c2cp40339k.pdf [file c2cp40339k.pdf]

## Supporting Information to:

# Early stages in the degradation of Metal-Organic Frameworks in liquid water from first-principles Molecular Dynamics

Luca Bellarosa,<sup>a</sup> Sofía Calero,<sup>b\*</sup> and Núria López<sup>a\*</sup>

<sup>a</sup>Institute of Chemical Research of Catalonia, ICIQ, Av. Països Catalans 16, 43007 Tarragona, Spain;

<sup>b</sup> Department of Physical, Chemical and Natural systems, University Pablo de Olavide, Ctra. de Utrera km. 1, 41013 Seville, Spain

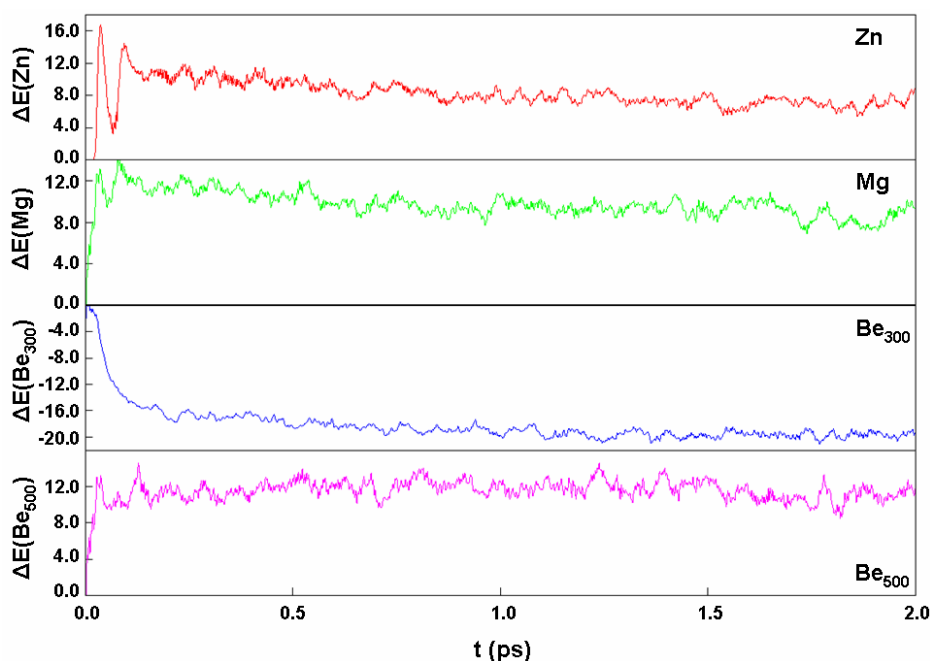

**Figure S1.** Potential energies for the different M-IRMOF-1 in the first two ps of simulation (equilibration time), with M=Zn, Mg, Be (T=300 K), or Be (T=500 K). All the energies,  $\Delta E$ , refer to the initial configuration and are in eV. All the initial configurations were minimized; the  $\text{Be}_{300}$  case is a particular case characterized by a local minimum. All the energies oscillate around a constant value after 0.8-1.0 ps.  $\text{Be}_{500}$ , run at higher temperature, is characterized by greater oscillations.
